# Supplementary material for: Cold-programmed shape-morphing structures based on grayscale digital light processing 4D printing
Source: PubMed Central journal article supplement (PMC10491591; doi:10.1038/s41467-023-41170-4), 2023-09-08
Supplement: 41467_2023_41170_MOESM3_ESM.pdf [file 41467_2023_41170_MOESM3_ESM.pdf]

## **Description of Additional Supplementary Files**

**Supplementary Movie 1:** Cold-draw programming and recovery

**Supplementary Movie 2:** Cold-programmed wave structure

**Supplementary Movie 3:** Cold-programmed helices structure

**Supplementary Movie 4:** Cold-programmed hand structure

**Supplementary Movie 5:** Cold-programmed dual-direction panel structure

**Supplementary Movie 6:** Two-stage cold-programmed shape morphing

**Supplementary Movie 7:** Cold-programmed straw with micro-hinge

**Supplementary Movie 8:** g-DLP printing of hinge structure
